# Supplementary material
Source: PubMed Central journal article supplement (PMC4221206)
Supplement: supp_nst161_scan-13-148.pdf [file supp_nst161_scan-13-148.pdf]

### **Immunoassays used to measure plasma hormone concentrations.**

Oxytocin concentrations were determined by R. Landgraf, Munich (Neumann *et al.*, 2013). Copeptin was determined according to (Morgenthaler *et al.*, 2006; Simmler *et al.*, 2011). Cortisol concentrations were determined by an automated immunoassay (Immulite 2000 Cortisol<sup>®</sup>, Siemens Medical Solutions Diagnostics, Los Angeles, CA, USA). The limit of detection was 5.5 nmol/L. The intra-assay coefficient of variation was 5.3% and the inter-assay coefficient of variation was 7.2%. Prolactin concentrations were determined by an immunoassay (Cobas<sup>®</sup>, Roche Diagnostics, Basel, Switzerland) using a modular analytics E170 analyzer. Sensitivity was 1mU/L. The intra-assay coefficient of variation was 1.7% and the inter-assay coefficient of variation was 1.4%. Testosterone was determined using an electro-chemiluminescence immunoassay (Cobas<sup>®</sup>, Roche Diagnostics, Basel, Switzerland). Sensitivity was 0.4 nmol/L. The intra-assay coefficient of variation and the inter-assay coefficient of variation were both <5%.

Table S1. Mean ± SEM values and statistics for subjective, empathic, social, emotional, and endocrine effects of MDMA (N=32)

|                                               |                  | all           |                 | women         |                  | men           |                 | MDMA (all)        |         | MDMA              |         | sex               |       | MDMA × sex        |       |
|-----------------------------------------------|------------------|---------------|-----------------|---------------|------------------|---------------|-----------------|-------------------|---------|-------------------|---------|-------------------|-------|-------------------|-------|
|                                               |                  | Placebo       | MDMA            | Placebo       | MDMA             | Placebo       | MDMA            | $F_{(1,31)}$      | $p$     | $F_{(1,31)}$      | $p$     | $F_{(1,31)}$      | $p$   | $F_{(1,31)}$      | $p$   |
| <b>Visual Analog Scale (VAS)</b>              |                  |               |                 |               |                  |               |                 |                   |         |                   |         |                   |       |                   |       |
| Happy                                         | $\Delta E_{max}$ | 3.7 ± 1.6     | 37.4 ± 2.7***   | 0.0 ± 0.0     | 42.5 ± 2.7***    | 7.3 ± 2.9     | 32.4 ± 4.5***   | 120.59            | < 0.001 | 157.52            | < 0.001 | 0.19              | 0.668 | 10.49             | 0.003 |
| Close to others                               | $\Delta E_{max}$ | 2.6 ± 1.6     | 28.6 ± 3.2***   | 0.3 ± 0.3     | 31.7 ± 4.0***    | 4.9 ± 3.2     | 25.6 ± 4.9***   | 67.52             | < 0.001 | 72.01             | < 0.001 | 0.04              | 0.851 | 3.06              | 0.090 |
| Open                                          | $\Delta E_{max}$ | 1.8 ± 0.7     | 31.7 ± 3.3***   | 0.7 ± 0.5     | 31.8 ± 4.1***    | 2.9 ± 1.2     | 31.6 ± 5.1***   | 80.77             | < 0.001 | 78.18             | < 0.001 | 0.02              | 0.896 | 0.01              | 0.940 |
| <b>Adjective Mood Rating Scale (AMRS)</b>     |                  |               |                 |               |                  |               |                 |                   |         |                   |         |                   |       |                   |       |
| Activity                                      | $\Delta E_{max}$ | 0.09 ± 0.30   | 2.88 ± 0.67***  | -0.19 ± 0.39  | 2.19 ± 0.91*     | 0.38 ± 0.48   | 3.56 ± 0.97**   | 24.48             | < 0.001 | 24.10             | < 0.001 | 1.25              | 0.272 | 0.51              | 0.479 |
| Inactivity                                    | $\Delta E_{max}$ | 0.72 ± 0.34   | 2.28 ± 0.49**   | 1.56 ± 0.54   | 2.75 ± 0.82      | -0.13 ± 0.23  | 1.81 ± 0.56     | 7.72              | 0.009   | 7.58              | 0.010   | 4.85              | 0.035 | 0.44              | 0.514 |
| Extroversion                                  | $\Delta E_{max}$ | -0.19 ± 0.26  | 3.41 ± 0.58***  | -0.13 ± 0.29  | 3.31 ± 0.83***   | -0.25 ± 0.42  | 3.50 ± 0.84***  | 40.58             | < 0.001 | 39.37             | < 0.001 | 0.00              | 0.965 | 0.07              | 0.787 |
| Introversion                                  | $\Delta E_{max}$ | 0.59 ± 0.26   | 2.09 ± 0.39**   | 0.75 ± 0.44   | 2.81 ± 0.65*     | 0.44 ± 0.27   | 1.38 ± 0.39     | 10.05             | 0.003   | 10.19             | 0.003   | 3.86              | 0.059 | 1.43              | 0.241 |
| Well-being                                    | $\Delta E_{max}$ | -0.06 ± 0.49  | 5.81 ± 0.87***  | -0.19 ± 0.64  | 5.63 ± 1.03***   | 0.06 ± 0.77   | 6.00 ± 1.43***  | 36.99             | < 0.001 | 35.81             | < 0.001 | 0.09              | 0.767 | 0.00              | 0.950 |
| Emotional excitation                          | $\Delta E_{max}$ | -0.66 ± 0.37  | 4.56 ± 0.91***  | -1.06 ± 0.57  | 5.75 ± 1.04***   | -0.25 ± 0.48  | 3.38 ± 1.47     | 28.46             | < 0.001 | 30.12             | < 0.001 | 0.62              | 0.438 | 2.81              | 0.104 |
| Anxiety                                       | $\Delta E_{max}$ | 0.19 ± 0.20   | 0.44 ± 0.20     | 0.06 ± 0.23   | 0.69 ± 0.34      | 0.31 ± 0.34   | 0.19 ± 0.21     | 0.78              | 0.390   | 0.80              | 0.380   | 0.19              | 0.670 | 1.79              | 0.191 |
| Dreaminess                                    | $\Delta E_{max}$ | 0.31 ± 0.24   | 3.72 ± 0.60***  | 0.69 ± 0.44   | 4.06 ± 0.62      | -0.06 ± 0.19  | 3.38 ± 1.05**   | 25.48             | < 0.001 | 24.66             | < 0.001 | 1.34              | 0.256 | 0.00              | 0.964 |
| <b>Multifaceted Empathy Test (MET)</b>        |                  |               |                 |               |                  |               |                 |                   |         |                   |         |                   |       |                   |       |
| <i>Explicit emotional empathy</i>             |                  |               |                 |               |                  |               |                 |                   |         |                   |         |                   |       |                   |       |
| All stimuli                                   | rating           | 4.40 ± 0.29   | 5.01 ± 0.30**   | 4.96 ± 0.37   | 5.15 ± 0.41      | 3.84 ± 0.41   | 4.87 ± 0.44*    | 6.05              | 0.019   | 6.45              | 0.017   | 1.85              | 0.184 | 3.03              | 0.092 |
| Positive stimuli                              | rating           | 4.60 ± 0.31   | 5.46 ± 0.35**   | 5.21 ± 0.40   | 5.75 ± 0.53      | 3.99 ± 0.44   | 5.17 ± 0.46*    | 8.60              | 0.006   | 8.65              | 0.006   | 2.38              | 0.133 | 1.17              | 0.288 |
| Negative stimuli                              | rating           | 4.20 ± 0.31   | 4.57 ± 0.33     | 4.71 ± 0.42   | 4.55 ± 0.46      | 3.68 ± 0.41   | 4.58 ± 0.48     | 1.90              | 0.178   | 2.10              | 0.158   | 0.77              | 0.388 | 4.15              | 0.051 |
| <i>Implicit emotional empathy</i>             |                  |               |                 |               |                  |               |                 |                   |         |                   |         |                   |       |                   |       |
| All stimuli                                   | rating           | 4.30 ± 0.29   | 4.81 ± 0.32*    | 4.78 ± 0.39   | 4.79 ± 0.47      | 3.82 ± 0.40   | 4.82 ± 0.44*    | 4.29              | 0.047   | 4.80              | 0.036   | 0.69              | 0.412 | 4.68              | 0.039 |
| Positive stimuli                              | rating           | 4.36 ± 0.32   | 4.98 ± 0.35*    | 4.89 ± 0.45   | 5.00 ± 0.56      | 3.83 ± 0.43   | 4.95 ± 0.45*    | 5.02              | 0.032   | 5.49              | 0.026   | 0.80              | 0.377 | 3.86              | 0.059 |
| Negative stimuli                              | rating           | 4.24 ± 0.28   | 4.63 ± 0.33     | 4.68 ± 0.37   | 4.57 ± 0.46      | 3.81 ± 0.40   | 4.69 ± 0.48     | 2.14              | 0.154   | 2.33              | 0.138   | 0.44              | 0.512 | 3.79              | 0.061 |
| <i>Cognitive empathy</i>                      |                  |               |                 |               |                  |               |                 |                   |         |                   |         |                   |       |                   |       |
| All stimuli                                   | % correct        | 62.3 ± 1.5    | 61.9 ± 1.6      | 64.1 ± 1.7    | 64.2 ± 2.2       | 60.6 ± 2.6    | 59.5 ± 0.3      | 0.13              | 0.717   | 0.13              | 0.721   | 2.05              | 0.163 | 0.23              | 0.634 |
| Positive stimuli                              | % correct        | 65.5 ± 2.1    | 63.9 ± 2.7      | 67.8 ± 2.6    | 68.4 ± 3.6       | 63.1 ± 3.2    | 59.4 ± 3.7      | 0.57              | 0.455   | 0.11              | 0.58    | 0.454             | 1.13  | 0.296             |       |
| Negative stimuli                              | % correct        | 59.2 ± 1.8    | 59.7 ± 1.8      | 60.3 ± 1.9    | 60.0 ± 2.6       | 58.1 ± 3.2    | 59.4 ± 2.5      | 0.05              | 0.822   | 0.05              | 0.824   | 0.23              | 0.638 | 0.14              | 0.711 |
| <b>Social Value Orientation (SVO) test</b>    |                  |               |                 |               |                  |               |                 |                   |         |                   |         |                   |       |                   |       |
|                                               | angle (°)        | 31.75 ± 2.73  | 36.83 ± 1.68*   | 36.83 ± 1.59  | 36.60 ± 1.87     | 26.66 ± 4.94  | 37.06 ± 2.86**  | 4.42              | 0.044   | 5.061             | 0.032   | 1.63              | 0.211 | 5.52              | 0.026 |
|                                               | IA index         | 0.48 ± 0.07   | 0.36 ± 0.06     | 0.44 ± 0.08   | 0.34 ± 0.09      | 0.54 ± 0.12   | 0.42 ± 0.08     | 3.39 <sup>a</sup> | 0.079   | 3.23 <sup>a</sup> | 0.088   | 1.63 <sup>a</sup> | 0.217 | 0.02 <sup>a</sup> | 0.904 |
| <b>Facial Emotion Recognition Task (FERT)</b> |                  |               |                 |               |                  |               |                 |                   |         |                   |         |                   |       |                   |       |
| <i>Accuracy</i>                               |                  |               |                 |               |                  |               |                 |                   |         |                   |         |                   |       |                   |       |
| All emotions                                  | % correct        | 75.3 ± 2.4    | 66.2 ± 2.4***   | 79.6 ± 1.8    | 66.7 ± 2.0***    | 71.0 ± 4.3    | 65.8 ± 4.5      | 28.63             | < 0.001 | 33.28             | < 0.001 | 1.10              | 0.302 | 6.04              | 0.020 |
| Happy                                         | % correct        | 94.5 ± 2.2    | 93.5 ± 2.9      | 98.4 ± 1.1    | 96.9 ± 1.3       | 90.6 ± 4.0    | 90.1 ± 5.7      | 0.27              | 0.607   | 0.26              | 0.613   | 2.46              | 0.128 | 0.07              | 0.800 |
| Fearful                                       | % correct        | 55.5 ± 4.6    | 39.3 ± 4.0***   | 62.0 ± 5.3    | 35.9 ± 6.0***    | 49.0 ± 7.2    | 42.7 ± 5.3      | 14.90             | < 0.001 | 17.60             | < 0.001 | 0.17              | 0.682 | 6.61              | 0.015 |
| Angry                                         | % correct        | 85.2 ± 3.0    | 72.7 ± 4.1***   | 91.2 ± 1.6    | 76.6 ± 4.5**     | 79.2 ± 5.4    | 68.8 ± 6.9      | 18.60             | < 0.001 | 18.31             | < 0.001 | 2.37              | 0.134 | 0.51              | 0.481 |
| Sad                                           | % correct        | 83.1 ± 3.0    | 78.4 ± 2.9      | 88.5 ± 2.1    | 75.5 ± 3.2**     | 77.6 ± 5.3    | 81.3 ± 4.9      | 2.34              | 0.136   | 2.98              | 0.095   | 0.27              | 0.608 | 9.42              | 0.005 |
| Disgust                                       | % correct        | 64.8 ± 3.5    | 54.7 ± 4.6*     | 64.6 ± 5.5    | 53.5 ± 6.5       | 65.1 ± 4.6    | 55.7 ± 6.6      | 5.81              | 0.022   | 5.63              | 0.024   | 0.03              | 0.856 | 0.03              | 0.855 |
| Surprise                                      | % correct        | 68.8 ± 3.5    | 58.9 ± 3.6**    | 72.9 ± 4.3    | 61.5 ± 4.8       | 64.6 ± 5.5    | 56.3 ± 5.3      | 9.79              | 0.004   | 9.55              | 0.004   | 1.16              | 0.291 | 0.24              | 0.629 |
| <i>Stopping threshold</i>                     |                  |               |                 |               |                  |               |                 |                   |         |                   |         |                   |       |                   |       |
| All emotions                                  | % intensity      | 51.6 ± 2.3    | 40.0 ± 1.9      | 51.2 ± 3.0    | 55.6 ± 3.3       | 52.1 ± 3.5    | 51.9 ± 3.3      | 1.19              | 0.284   | 1.20              | 0.282   | 0.11              | 0.740 | 1.38              | 0.250 |
| Happy                                         | % intensity      | 39.7 ± 2.2    | 64.4 ± 3.1      | 38.5 ± 2.9    | 40.1 ± 2.8       | 40.9 ± 3.4    | 39.9 ± 2.6      | 0.02              | 0.883   | 0.02              | 0.884   | 0.09              | 0.767 | 0.38              | 0.541 |
| Fearful                                       | % intensity      | 57.3 ± 3.2    | 56.3 ± 2.6*     | 59.2 ± 4.0    | 67.0 ± 4.4       | 55.4 ± 5.1    | 61.6 ± 4.5      | 4.92              | 0.032   | 5.01              | 0.033   | 0.09              | 0.772 | 0.61              | 0.442 |
| Angry                                         | % intensity      | 56.6 ± 2.4    | 57.7 ± 2.5      | 54.7 ± 3.4    | 57.4 ± 3.8       | 57.6 ± 3.7    | 55.1 ± 3.9      | 0.21              | 0.653   | 0.18              | 0.672   | 0.02              | 0.878 | 0.45              | 0.510 |
| Sad                                           | % intensity      | 56.6 ± 2.4    | 52.5 ± 2.6      | 56.2 ± 3.0    | 59.3 ± 3.8       | 57.0 ± 3.9    | 56.1 ± 3.9      | 0.19              | 0.666   | 0.19              | 0.668   | 0.08              | 0.784 | 0.59              | 0.449 |
| Disgust                                       | % intensity      | 49.5 ± 2.0    | 52.7 ± 3.2      | 49.8 ± 2.7    | 55.1 ± 3.3       | 49.2 ± 2.9    | 50.1 ± 4.0      | 0.97              | 0.332   | 1.00              | 0.325   | 0.60              | 0.445 | 0.52              | 0.476 |
| Surprise                                      | % intensity      | 50.5 ± 2.9    | 53.8 ± 2.3      | 48.7 ± 4.0    | 55.5 ± 4.4       | 52.4 ± 4.3    | 49.9 ± 4.8      | 0.77              | 0.388   | 0.84              | 0.367   | 0.03              | 0.861 | 3.89              | 0.058 |
| <b>Hormones</b>                               |                  |               |                 |               |                  |               |                 |                   |         |                   |         |                   |       |                   |       |
| Oxytocin (pg/ml)                              | $\Delta E_{max}$ | 12.2 ± 8.0    | 66.0 ± 14.9***  | 13.36 ± 15.39 | 54.7 ± 18.3*     | 11.10 ± 5.11  | 77.36 ± 23.67** | 19.84             | < 0.001 | 19.31             | < 0.001 | 2.12              | 0.156 | 0.16              | 0.691 |
| Copeptin (pg/ml)                              | $\Delta E_{max}$ | -1.1 ± 0.3    | 1.6 ± 1.1       | -0.5 ± 0.4    | 1.2 ± 0.6        | -1.8 ± 0.4    | 2.3 ± 2.1       | 1.10              | 0.303   | 1.22              | 0.278   | 0.71              | 0.407 | 1.88              | 0.180 |
| Cortisol (nmol/L)                             | $\Delta E_{max}$ | -198.8 ± 24.4 | 187.2 ± 21.1*** | -208.0 ± 41.0 | 155.8 ± 20.5***  | -189.5 ± 27.6 | 218.7 ± 35.8*** | 98.70             | < 0.001 | 95.88             | < 0.001 | 0.12              | 0.736 | 0.11              | 0.738 |
| Prolactin (mU/L)                              | $\Delta E_{max}$ | -177.8 ± 26.6 | 402.6 ± 68.7*** | -222.6 ± 50.0 | 495.3 ± 108.4*** | -133.1 ± 15.4 | 310.0 ± 81.4*** | 127.8             | < 0.001 | 126.21            | < 0.001 | 0.07              | 0.794 | 0.61              | 0.440 |
| Testosterone (nmol/L) only men                | $\Delta E_{max}$ | -2.74 ± 0.50  | -0.94 ± 0.92    |               |                  |               |                 | 2.62 <sup>b</sup> | 0.127   |                   |         |                   |       |                   |       |
| Testosterone (nmol/L) only women              | $\Delta E_{max}$ | -0.11 ± 0.05  | -0.04 ± 0.03    |               |                  |               |                 | 1.62 <sup>b</sup> | 0.222   |                   |         |                   |       |                   |       |

<sup>a</sup> $p < 0.05$ , <sup>\*\*</sup> $p < 0.01$ , <sup>\*\*\*</sup> $p < 0.001$ . MDMA main effect for all subjects or *post hoc* test for male or female subjects compared with placebo. IA, inequality-aversion; <sup>a</sup> $F_{(1,29)}$ ; <sup>b</sup> $F_{(1,15)}$

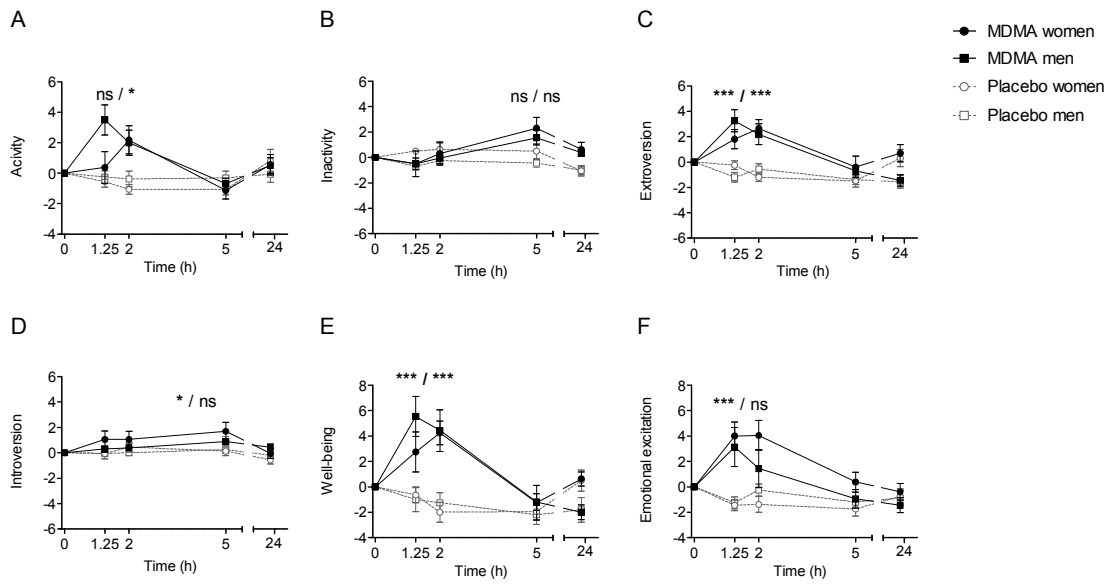

**Figure S1.** Subjective effects of MDMA measured using the adjective mood rating scale (AMRS). The data are expressed as mean  $\pm$  SEM score changes from predrug baseline. \* $p < 0.05$ , \*\*\* $p < 0.001$ , significant differences ( $E_{max}$ ) from placebo in women/men. ns=not significant.

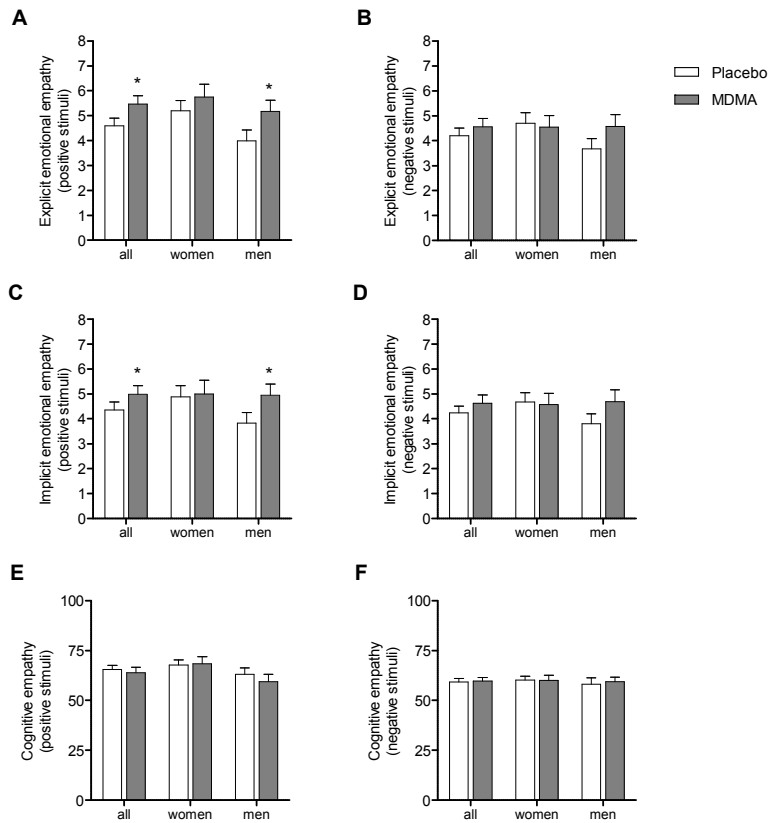

**Figure S2.** Effect of MDMA on (A,B) explicit and (C,D) implicit emotional empathy and (E,F) cognitive empathy according to emotional valence of the stimuli as assessed using the Multifaceted Empathy Test (MET). The significant MDMA-induced increases in explicit and implicit empathy observed for all stimuli (positive and negative stimuli combined as shown in Figure 2A,B in the article) are due to significant increases for (A,C) positive but not for (B,D) negative stimuli. In addition, effects of MDMA on emotional empathy were more pronounced in men. MDMA had no effect on cognitive empathy. The data are expressed as mean  $\pm$  SEM in 32 subjects. \* $p < 0.05$ , significant difference from placebo.

**Facial affect recognition.** Facial affect recognition was tested using a dynamic FERT (Domes *et al.*, 2008). Pictures of the six basic emotions (i.e., fear, sadness, disgust, happiness, anger, and surprise) were chosen from the NimStim set of facial expressions (Tottenham *et al.*, 2009) and morphed by 1% steps of intensity from 0% (neutral) to 100% of intensity of a specific emotion using Winmorph 2.0. Three female and three male faces were chosen, resulting in 36 sets of faces (6 emotions  $\times$  6 faces) with 100 pictures each. Each picture was presented for 80ms, beginning with 0% intensity and increasing up to 100% in 1% steps. The participants were instructed to press a stop button as soon as they recognized a specific emotion. After pressing the stop button, the picture disappeared, and the participants had to indicate the correct emotion out of six emotions. The 36 trials in one block were presented in a randomized order and presented twice, resulting in 72 trials. As dependent variables, the emotional intensity at which the trial was stopped for correct answers was recorded. The emotion recognition accuracy was then assessed, defined as the percentage of correctly identified emotions (Domes *et al.*, 2008).

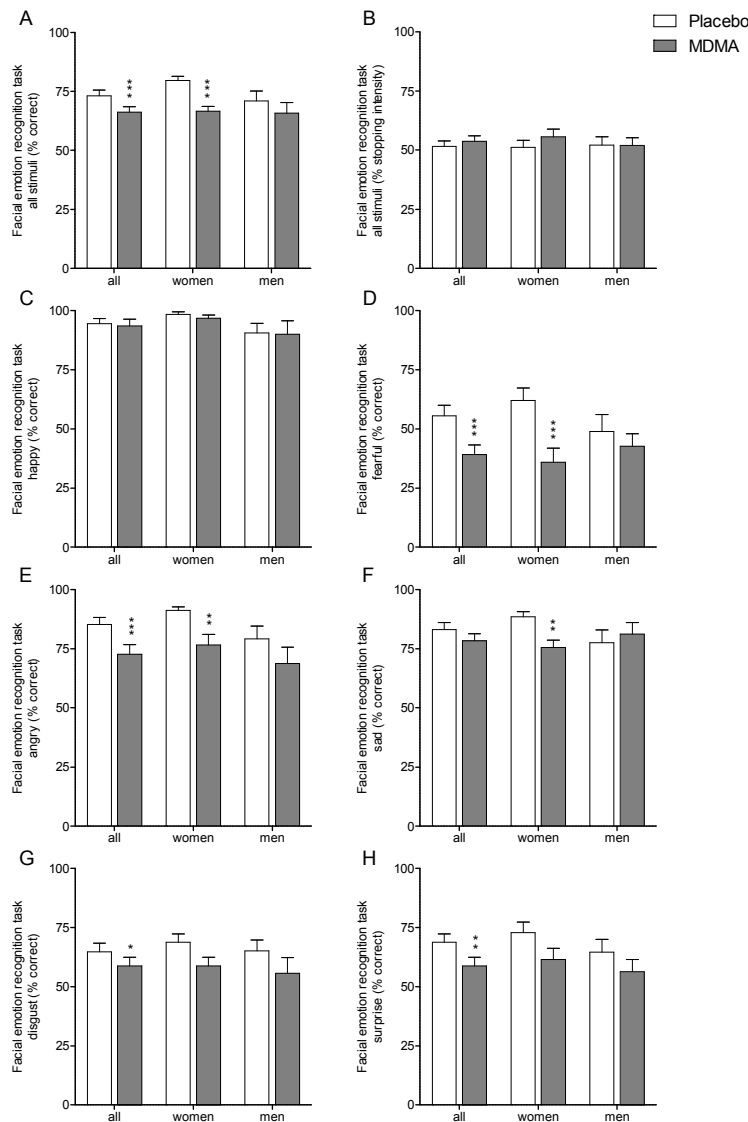

**Figure S3.** Effect of MDMA on affect identification accuracy in the Facial Emotion Recognition Task (FERT). (A) MDMA significantly reduced recognition accuracy for all subjects due to a significant effect in women but not in men. (D,E) MDMA primarily reduced the recognition accuracy of negative emotions, especially in women. The data are expressed as mean  $\pm$  SEM in 32 subjects. \* $p < 0.05$ , \*\* $p < 0.01$ , \*\*\* $p < 0.001$ , significant difference from placebo.

## REFERENCES

Domes G, Czeschnek D, Weidler F, Berger C, Fast K, Herpertz SC (2008). Recognition of facial affect in Borderline Personality Disorder. *J Pers Disord* 22: 135-147.

Morgenthaler NG, Struck J, Alonso C, Bergmann A (2006). Assay for the measurement of copeptin, a stable peptide derived from the precursor of vasopressin. *Clin Chem* 52: 112-119.

Neumann ID, Maloumy R, Beiderbeck DI, Lukas M, Landgraf R (2013). Increased brain and plasma oxytocin after nasal and peripheral administration in rats and mice. *Psychoneuroendocrinology* in press.

Simmler LD, Hysek CM, Liechti ME (2011). Sex differences in the effects of MDMA (ecstasy) on plasma copeptin in healthy subjects. *J Clin Endocrinol Metab* 96: 2844-2850.

Tottenham N, Tanaka JW, Leon AC, McCarry T, Nurse M, Hare TA, *et al.* (2009). The NimStim set of facial expressions: judgments from untrained research participants. *Psychiatry Res* 168: 242-249.
